# Supplementary material for: High-Level MYCN-Amplified RB1-Proficient Retinoblastoma Tumors Retain Distinct Molecular Signatures
Source: Ophthalmol Sci. 2022 Jun 20;2(3):100188. doi: 10.1016/j.xops.2022.100188 (PMC9559112; doi:10.1016/j.xops.2022.100188)
Supplement: Supplemental Figures S1-S6 [file mmc1.pdf]

A

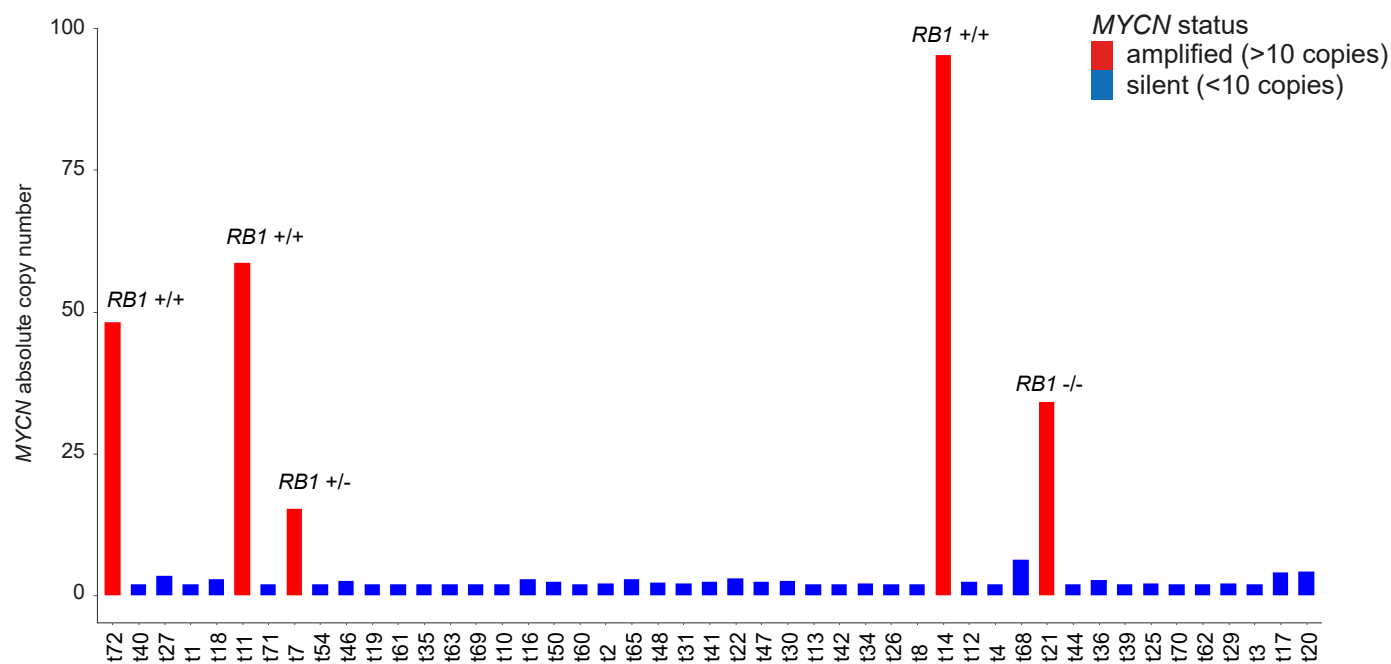

B

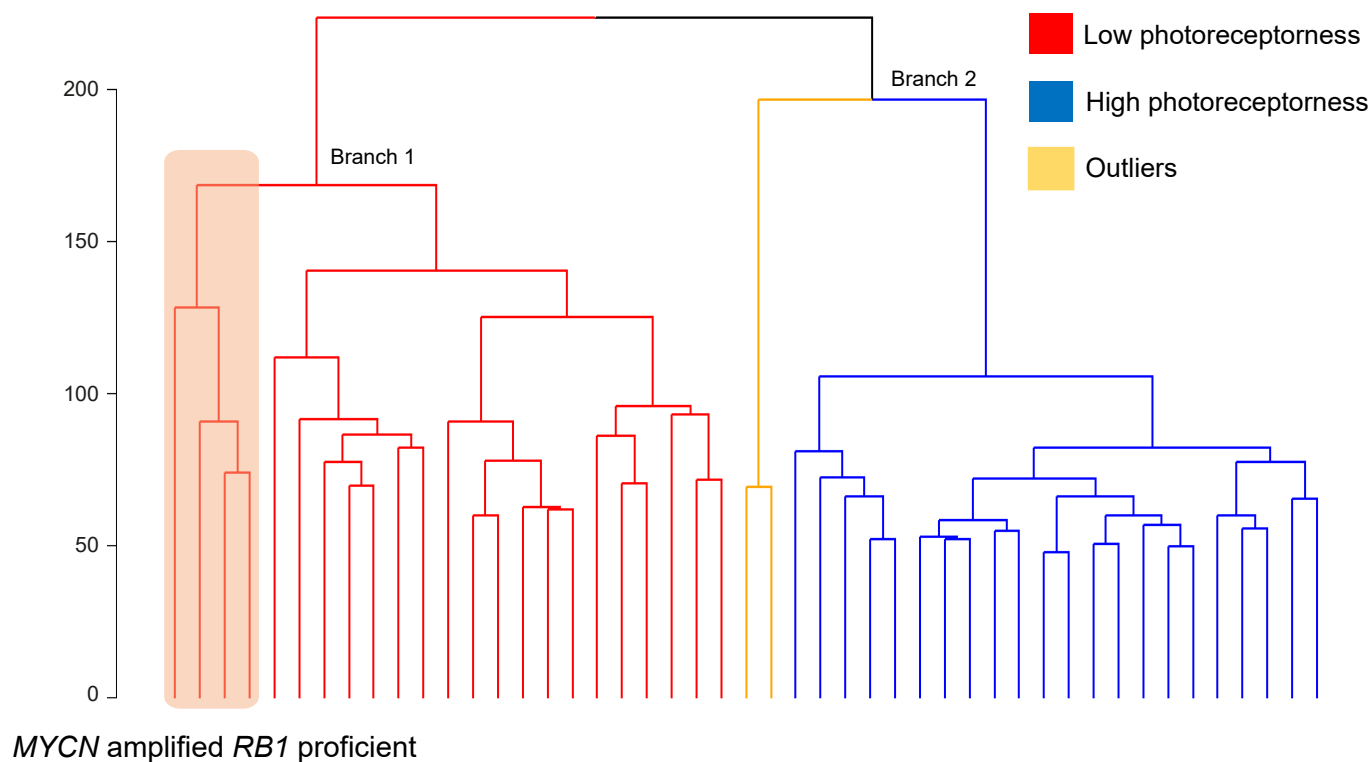

\*

**Supplementary figure 1.** The retinoblastoma cohort. **A)** Bar chart presenting the copy number of *MYCN* in the retinoblastoma cohort (N=47). Y-axis presents absolute copy number. X-axis presents samples. Overall, 5 samples indicate high-level *MYCN* amplification (>10), with 4 out 5 being *RB1*-proficient. **B)** Dendrogram presenting the hierarchical relations between retinoblastoma samples based on RMA- normalized expression values by the WARD2 method. Clustering results in to two main branches with *MYCN*-amplified *RB1*-proficient samples residing in branch 1, previously had been described as low photoreceptoriness sub-group.

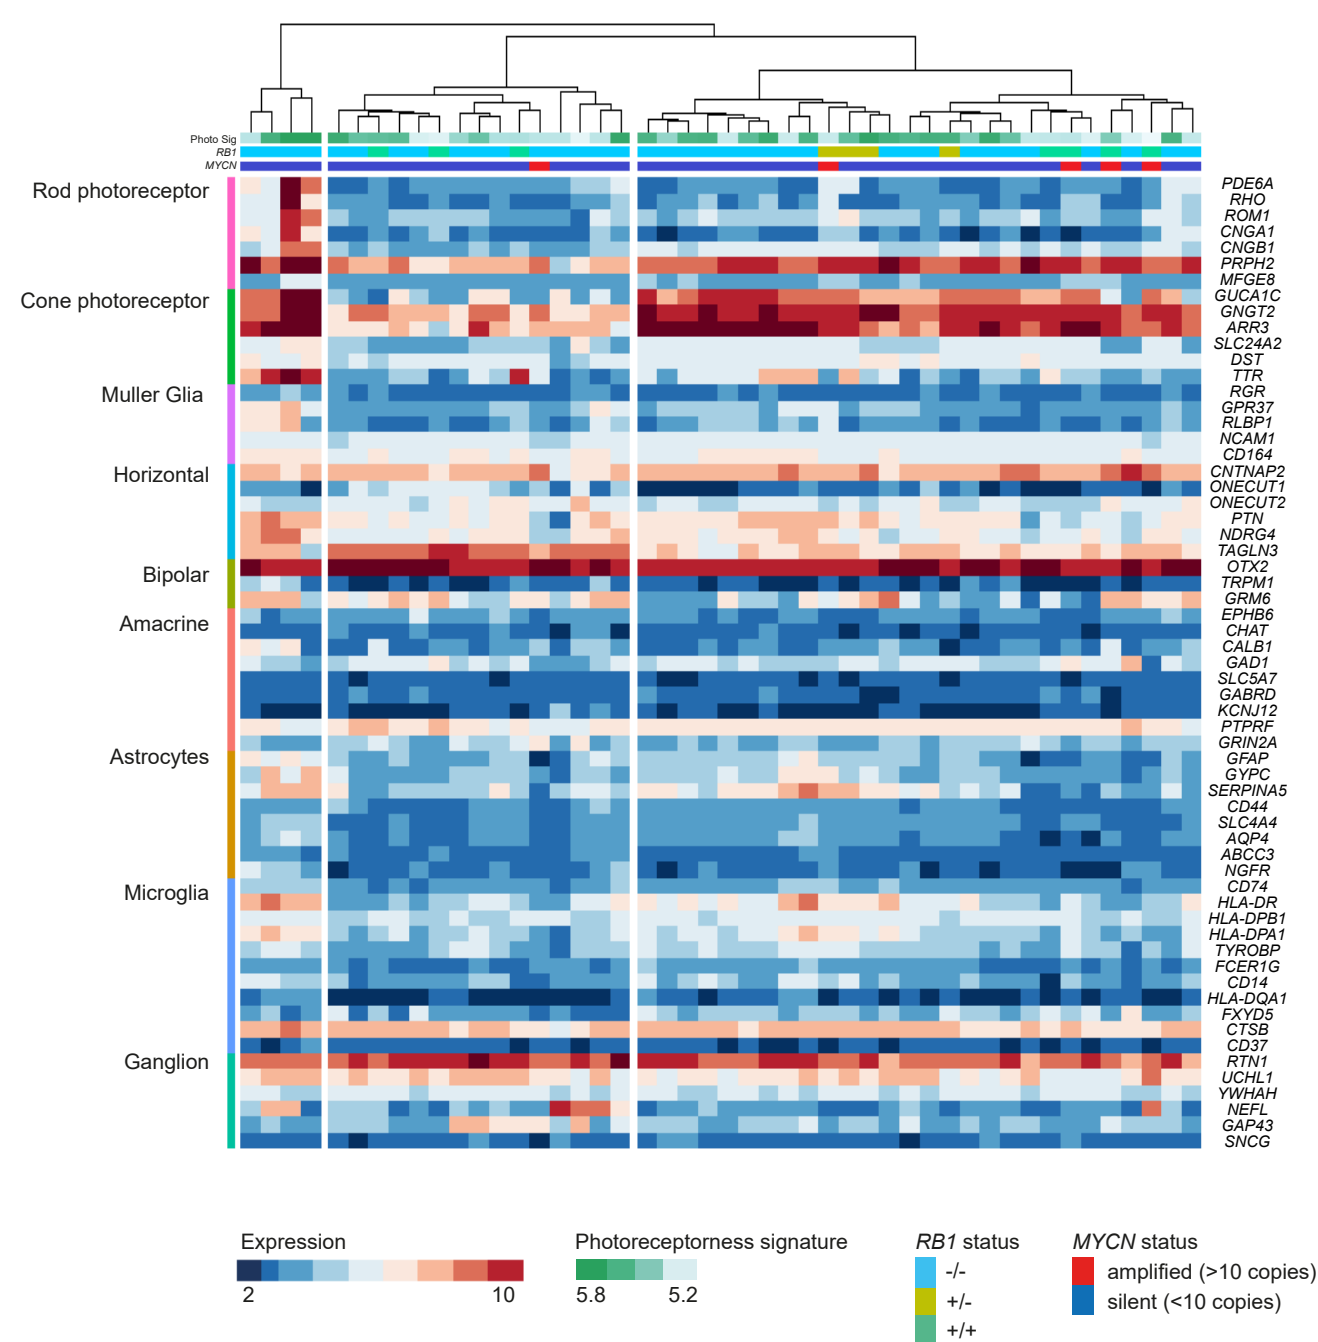

**Supplementary figure 2.** The mRNA expression of major retina markers in Retinoblastoma cohort.

Hierarchal clustering (WARD2) with heat map depicting the relationship between samples based on the expression of major known retina markers.

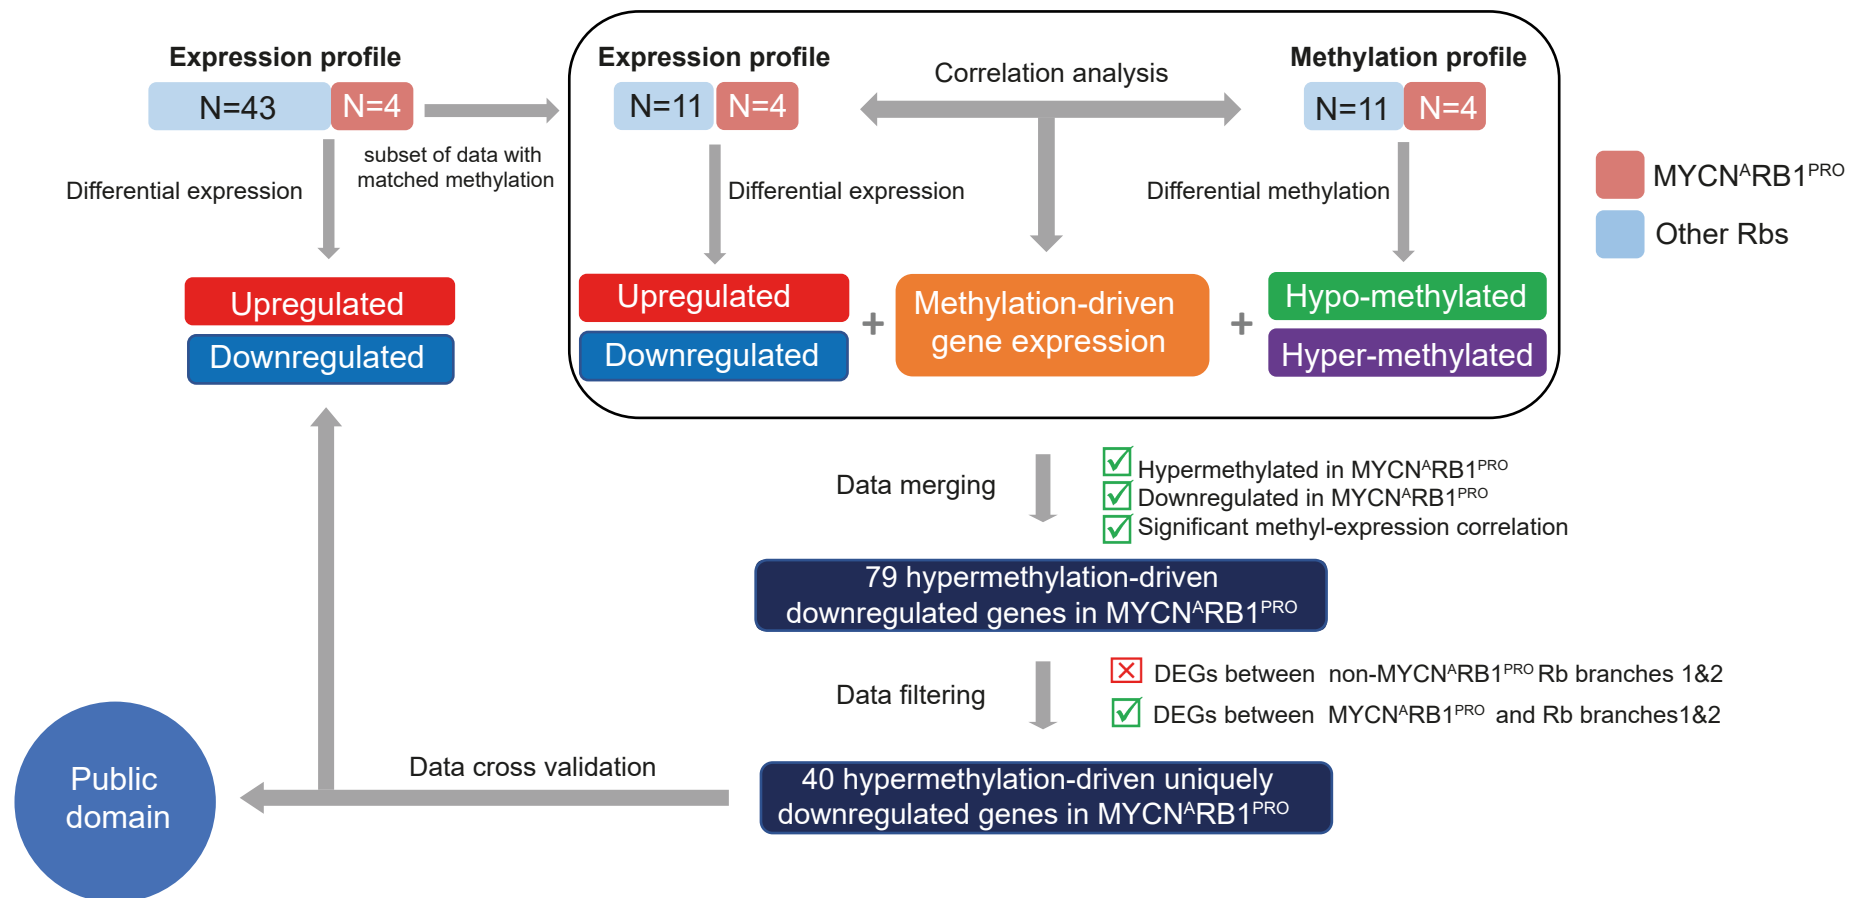

**Supplementary figure 3.** The workflow for the integrated expression-methylation analysis of retinoblastoma cohort. Upregulated: Log2FC > 0, Adjusted p.value < 0.05. Downregulated: Log2FC < 0, Adjusted p.value < 0.05. Hyper-methylated: Log2FC > 0, Adjusted p.value < 0.05. Hypo-methylated: Log2FC < 0, Adjusted p.value < 0.05. Significant Methyl-expression correlation:  $R < 0$ , q.value < 0.05. DEGs: Differentially Expressed Genes.

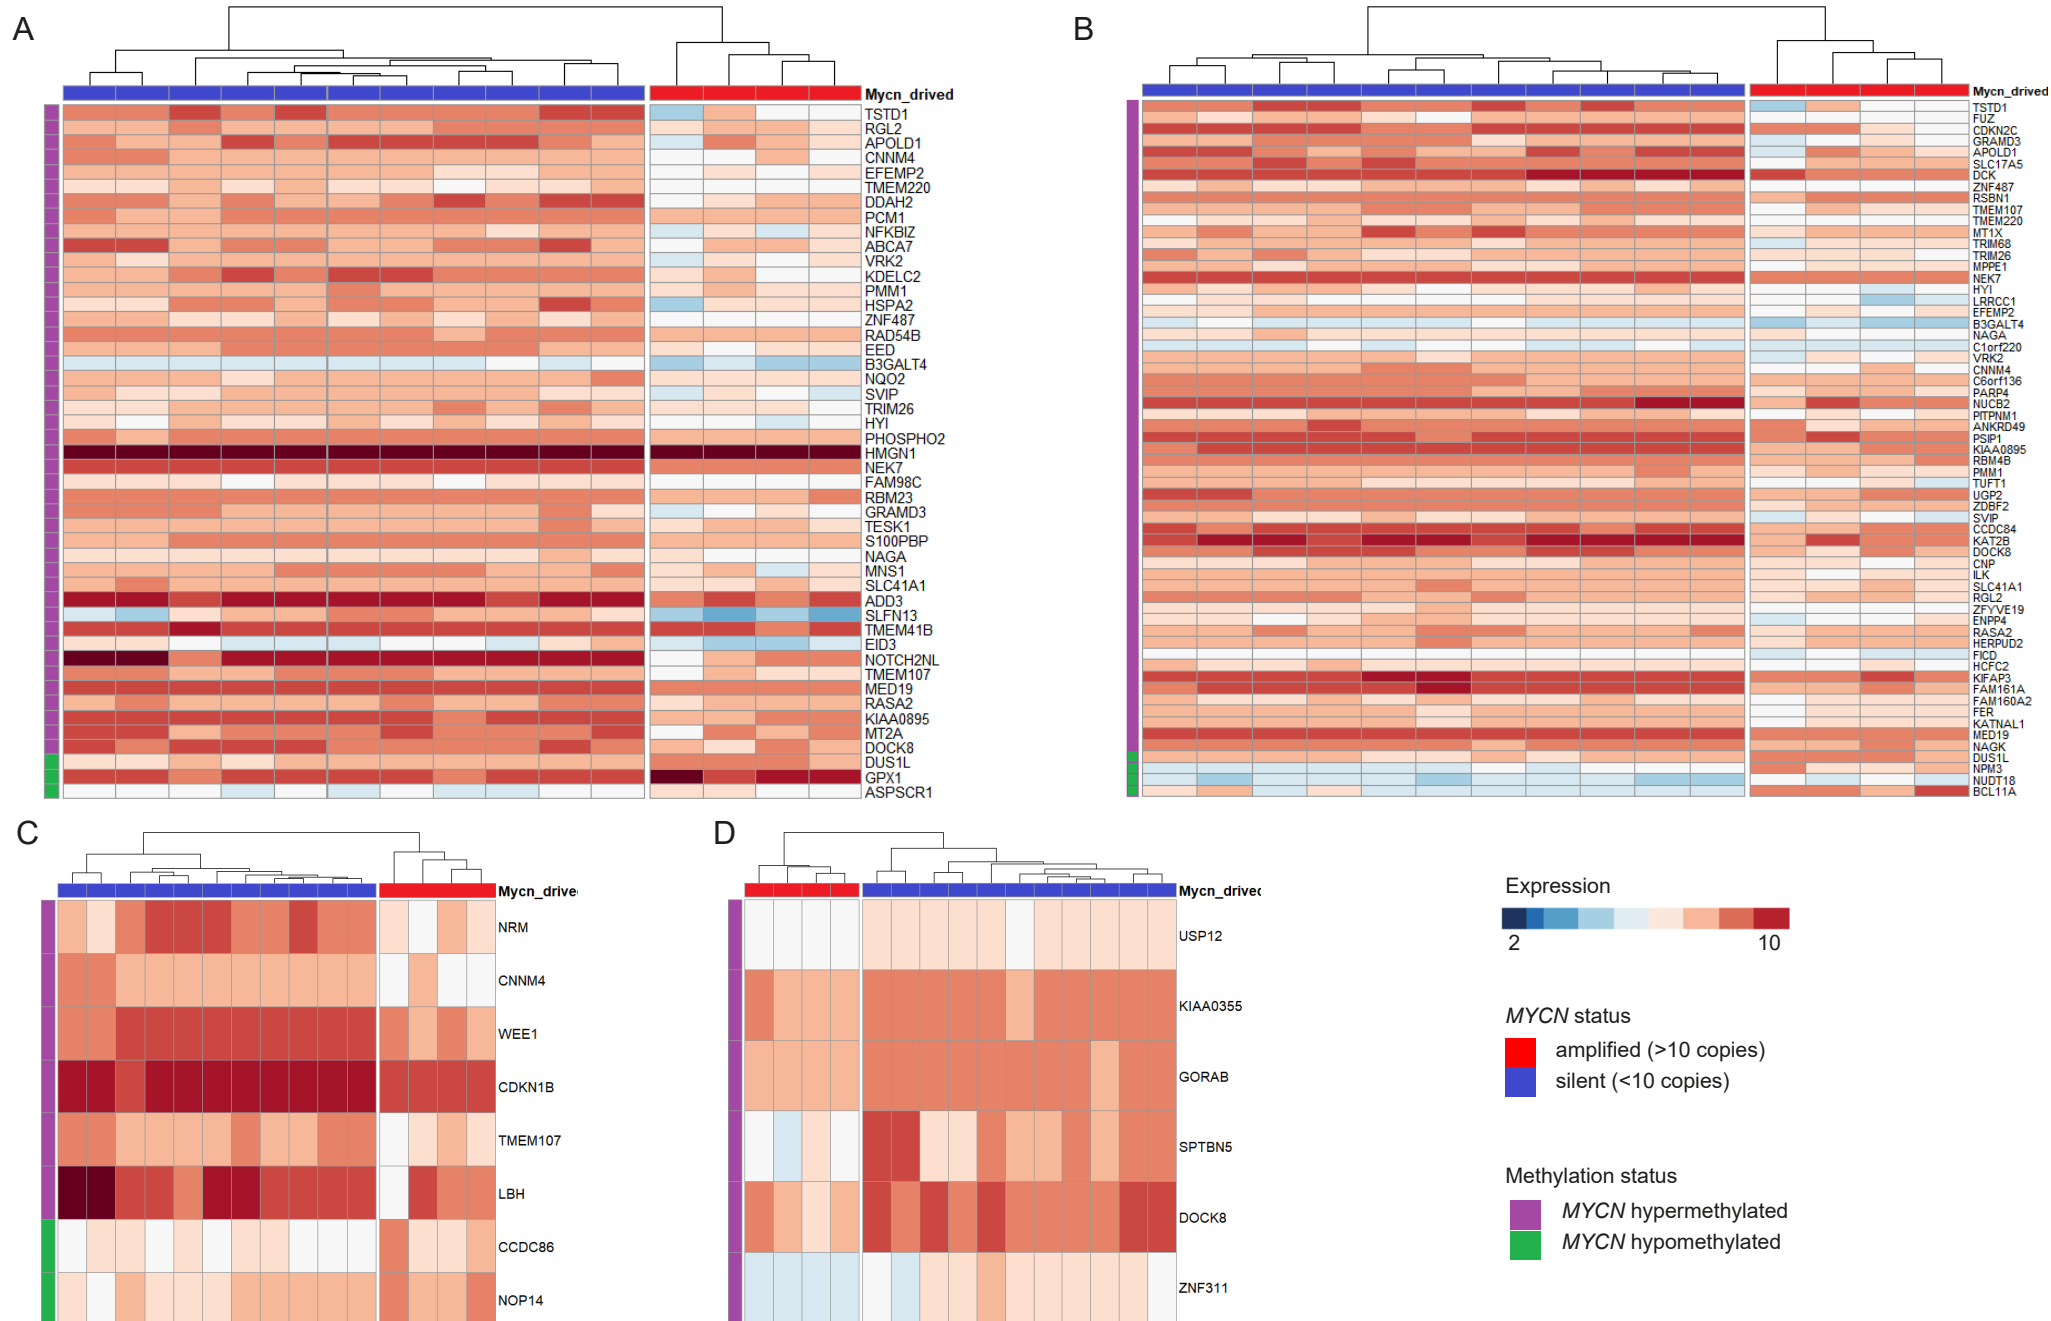

**Supplementary figure 4.** Methylation driven differential expression in *MYCN*-amplified tumours (N=4) vs. *MYCN* silent (N=11). Hierarchical clustering with heat maps depicts the results from the integrated analysis primarily performed for 15 retinoblastoma samples with matched expression and methylation data. Set of genes which are differentially- methylated, differentially-expressed and show significant gene expression-methylation correlation in *MYCN*-amplified retinoblastomas compared to *MYCN*-silent retinoblastomas. Four independent analyses were carried out for four methylation sites in relation to CpG islands **A**) Promoter island **B**) promoter shore **C**) promoter shelf **D**) promoter Open sea

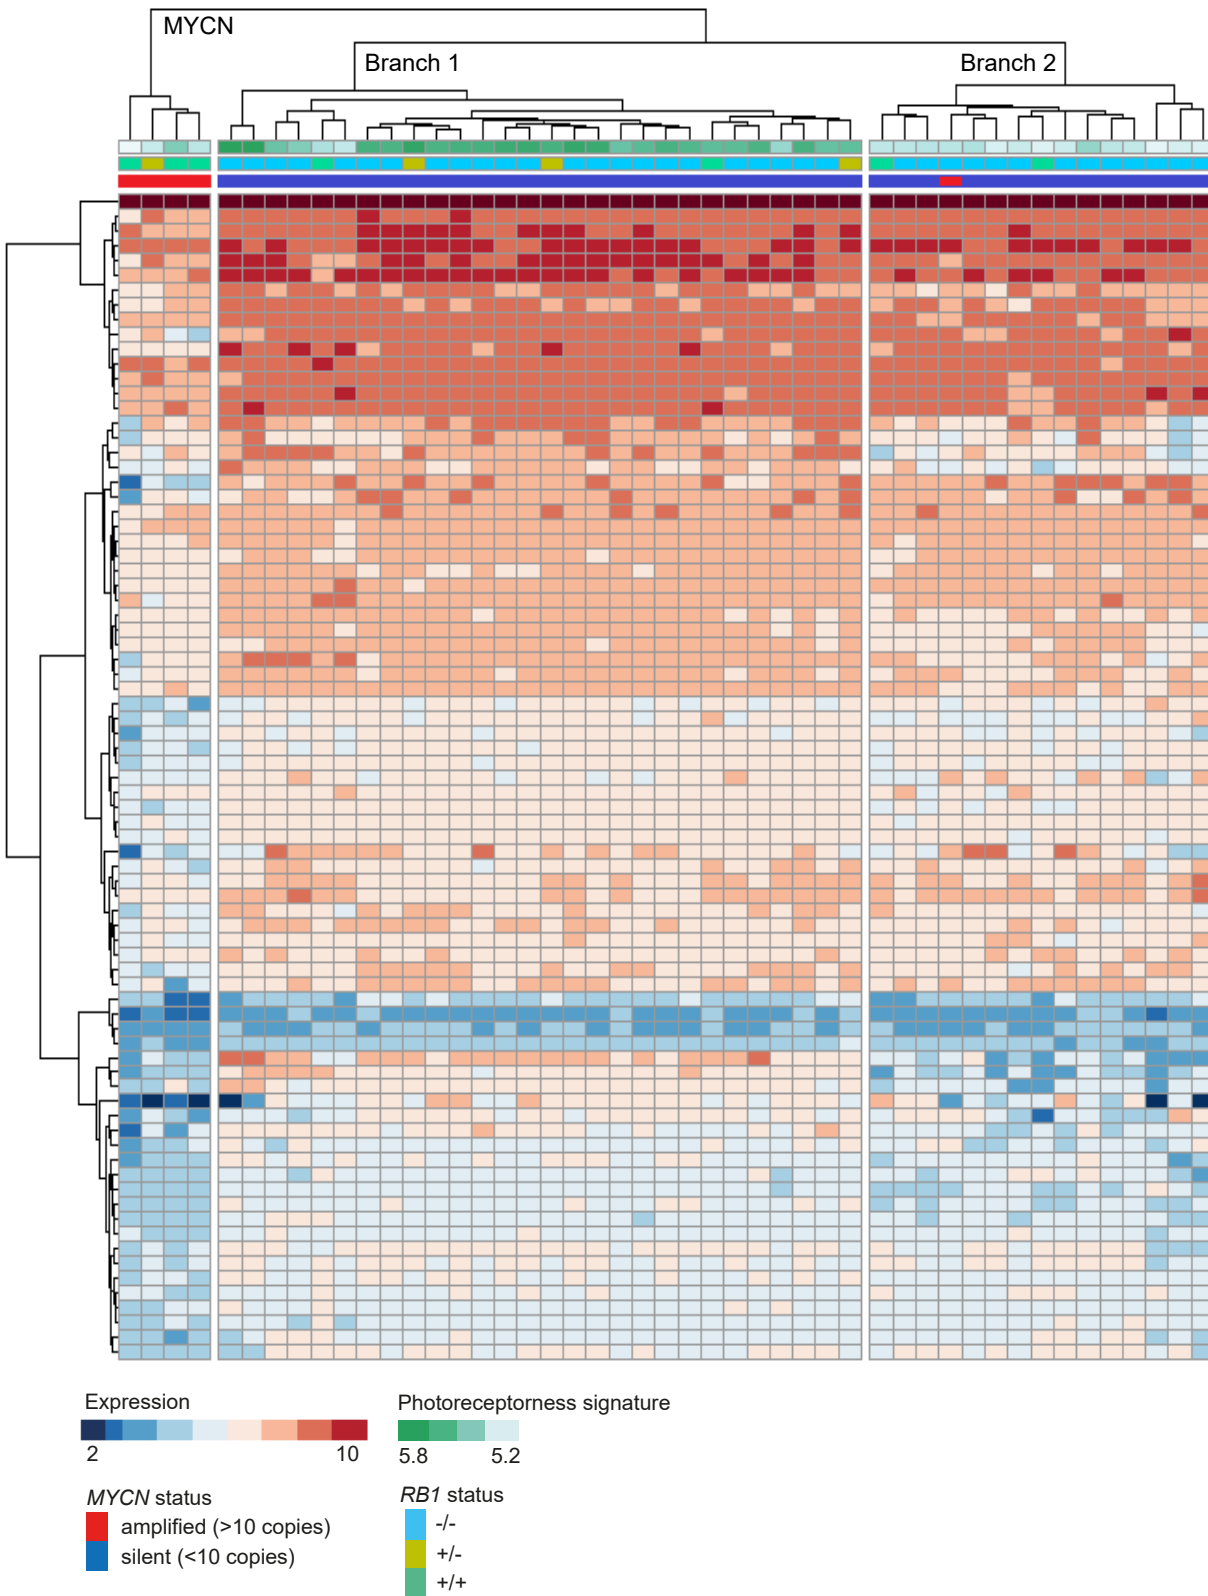

**Supplementary figure 5.** Hierarchical clustering with heatmap for 79 hypermethylation downregulated genes in *MYCN*-amplified *RB1*-proficient samples

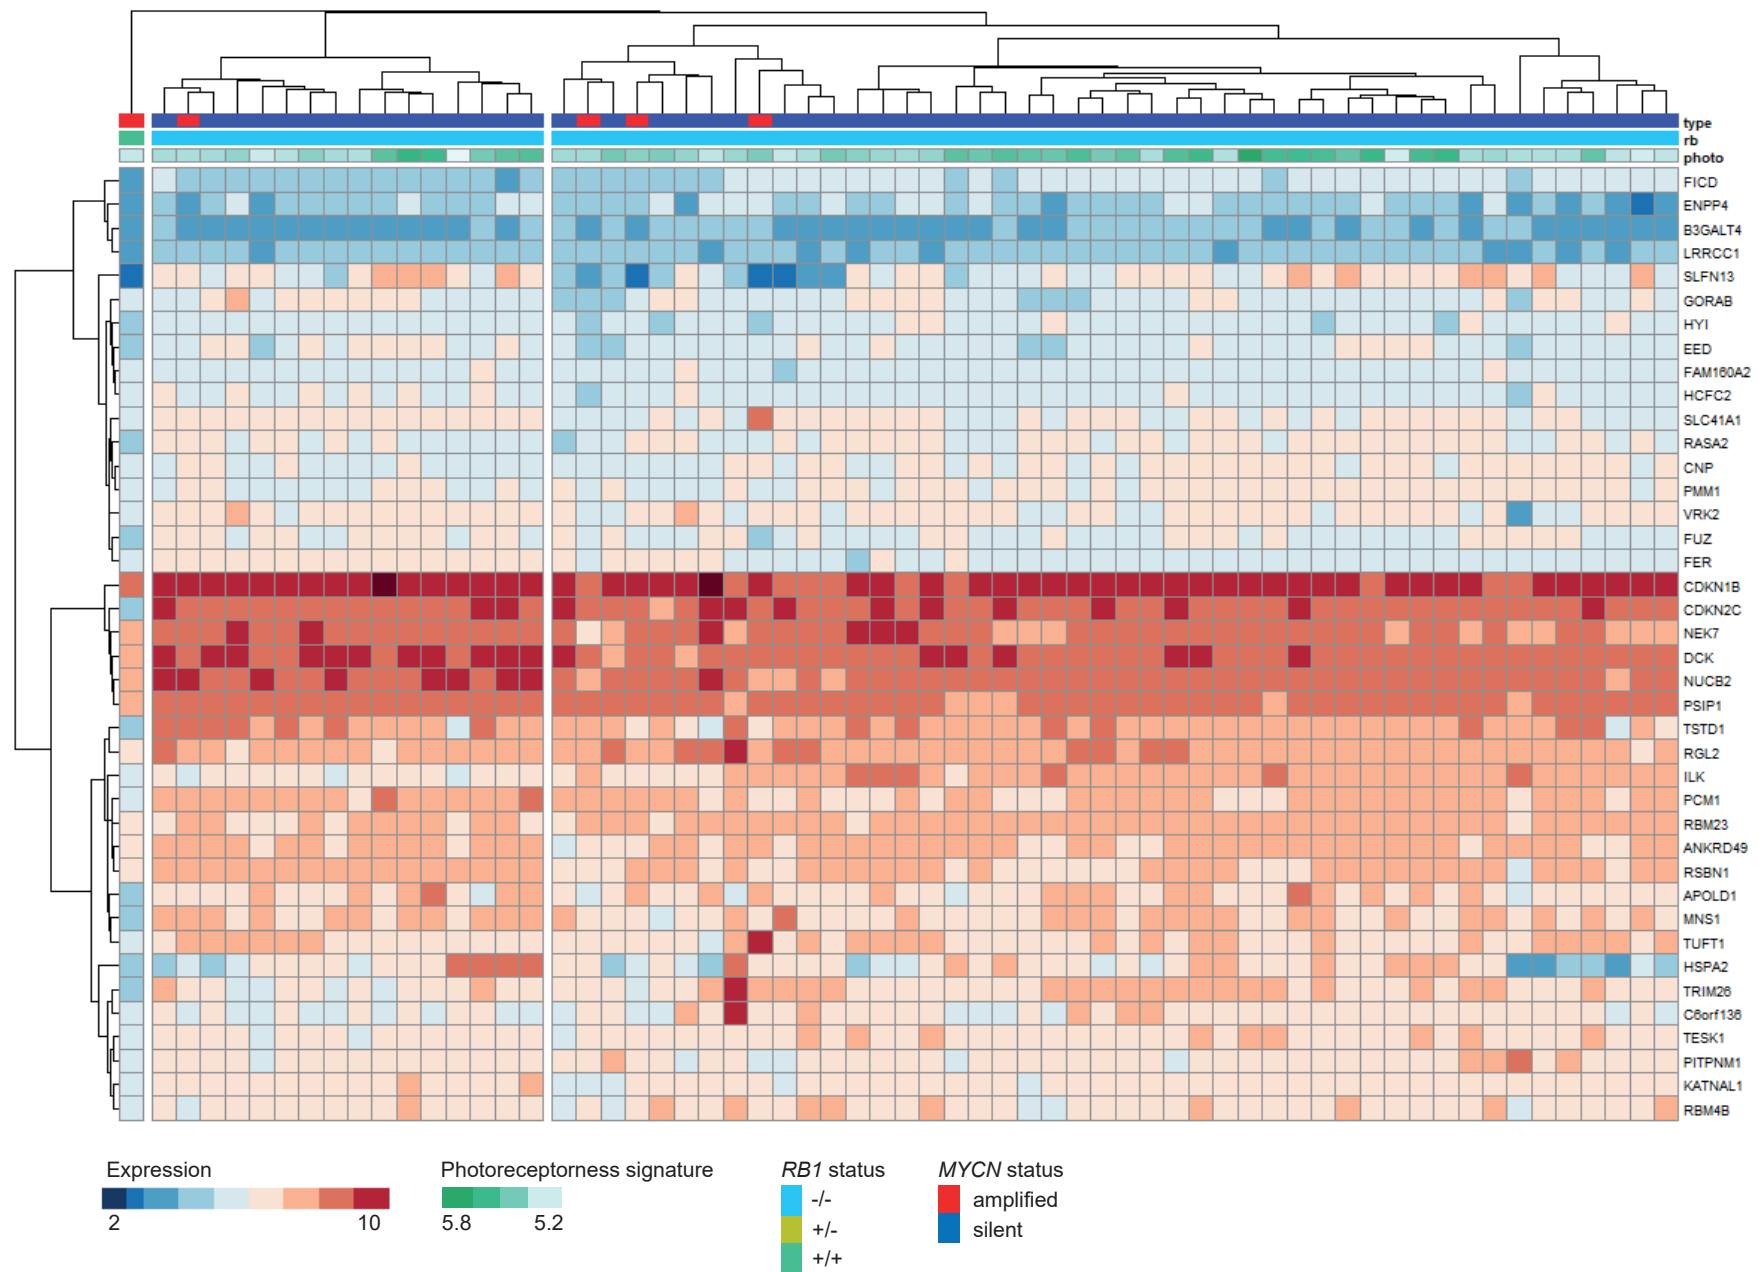

**Supplementary figure 6.** The expression of 40 Hyper-methylation driven genes in an independent publicly available retinoblastoma cohort (N=62). Hierarchical clustering (WARD2) with heatmap showing the relationship between samples for the expression of 40 genes. In agreement with the findings in the current study, the MYCN-amplified RB1-proficient retinoblastoma exhibits a distinct expression pattern for these genes and deviates from RB1 deficient tumours with or without MYCN amplification.
